# Supplementary material for: Advances in 4-Hydroxyphenylacetate-3-hydroxylase Monooxygenase
Source: MDPI journal article supplement (doi:10.3390/molecules28186699), 2023-09-19
Supplement: s1 [file s1]

Table S1. Examples and results of the molecular modifications of HpaB.

| Origins             | Substrates                                                                                           | Products                                                                                              | Strategy Used                                                  | Mutation sites             | Results                                                            | Reference |
|---------------------|------------------------------------------------------------------------------------------------------|-------------------------------------------------------------------------------------------------------|----------------------------------------------------------------|----------------------------|--------------------------------------------------------------------|-----------|
| <i>E. coli</i>      | 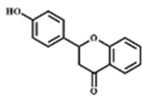<br>Naringenin      | <br>Eriodictyol      | Structure-guided and enzyme mutagenesis                        | Loop (residues 207 to 217) | 1.56-fold catalytic activity toward naringenin than the wild type. | [29]      |
| <i>A. baumannii</i> | <br>p-coumaric acid | <br>3,4,5-THCA       | Molecular dynamics simulations, and site-directed mutagenesis  | Y398S                      | Increased catalytic activity toward p-coumaric acid by 51% from 8% | [30]      |
| <i>E. coli</i>      | <br>Tyramine        | <br>Dopamine         | Molecular Docking, structure alignment, and enzyme mutagenesis | S210T/A211L/Q 212E         | 271-fold catalytic activity toward tyramine than the wild type.    | [33]      |
|                     | <br>Tyrosol         | <br>Hydroxytyrosol   |                                                                | S210T/A211L/Q 212E         | 17-fold catalytic activity toward tyrosol than the wild type.      |           |
|                     | <br>Tyrosol       | <br>Hydroxytyrosol | Directed evolution                                             | S210T/A211L/Q 212E/Y282H   | 2.2-fold catalytic activity toward tyrosol than the wild type.     | [37]      |

Table S1 (continued)

| Origins             | Substrates                                                                                        | Products                                                                                              | Strategy Used                                            | Mutation sites               | Results                                                                                                       | Reference |
|---------------------|---------------------------------------------------------------------------------------------------|-------------------------------------------------------------------------------------------------------|----------------------------------------------------------|------------------------------|---------------------------------------------------------------------------------------------------------------|-----------|
| <i>E. coli</i>      | Tyrosine                                                                                          | L-DOPA                                                                                                | Modeling, and mutation approach                          | T15P/S210F/A211K/Q212F/D284E | 15-fold catalytic activity toward tyrosine than the wild type.                                                | [39]      |
| <i>R. opacus</i>    | 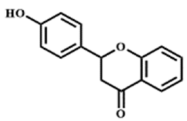<br>Naringenin   | <br>Eriodictyol      | Molecular Docking, MD Simulation, and enzyme mutagenesis | Y215A                        | $K_{cat}/K_m$ of naringenin catalyzed by the mutant Y215A increased by 25.3 times relative to the wild type.  | [42]      |
| <i>E. coli</i>      | <br>Resveratrol  | <br>Piceatannol      | Molecular Docking and saturation mutagenesis             | I157L/A211D                  | 4.7-fold catalytic activity toward resveratrol than the wild type.                                            | [52]      |
| <i>A. baumannii</i> | <br>Tyramine    | <br>Dopamine        | Site-directed mutagenesis                                | R263D                        | Expanding the substrate spectrum of <i>AbHpaB</i> , <i>AbHpaB</i> <sup>R263D/Y398D</sup> catalyzes tyramine   | [53]      |
|                     | <br>Octopamine | <br>Norepinephrine |                                                          | R263D/Y398D                  | Expanding the substrate spectrum of <i>AbHpaB</i> , <i>AbHpaB</i> <sup>R263D/Y398D</sup> catalyzes octopamine |           |

Table S1 (continued)

| Origins             | Substrates                                                                                                       | Products                                                                                                                    | Strategy Used                                                            | Mutation sites | Results                                                                              | Reference |
|---------------------|------------------------------------------------------------------------------------------------------------------|-----------------------------------------------------------------------------------------------------------------------------|--------------------------------------------------------------------------|----------------|--------------------------------------------------------------------------------------|-----------|
| <i>A. baumannii</i> | 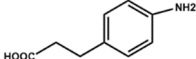<br>4-aminophenylacetic<br>acid | <br>3-hydroxy-4-<br>aminophenylacetic acid | Site-directed mutagenesis<br>of amino acids near the<br>substrate pocket | S146A          | <i>AbHpaB</i> <sup>S146A</sup> increased catalytic<br>4-APA activity from 4% to 100% | [54]      |

Table S2 Examples of application of HpaB and its mutant to synthesis catechols using direct phenol precursors by one-step biotransformation

| Method       | Catalysts                                                                                                                  | Production condition                                                                                                                                                                                                                                                                    | Reaction                                                                                                                    | Results                                                                                                       | Reference |
|--------------|----------------------------------------------------------------------------------------------------------------------------|-----------------------------------------------------------------------------------------------------------------------------------------------------------------------------------------------------------------------------------------------------------------------------------------|-----------------------------------------------------------------------------------------------------------------------------|---------------------------------------------------------------------------------------------------------------|-----------|
| Fermentation | <i>E. coli</i> overexpressing native HpaBC (HpaBC expressed on double plasmids, BL21 (DE3)-pETDuet/hpaBC-pRSFDuet-EcHpaCB) | M9 medium, 80 mg·L <sup>-1</sup> substrate added after induced with 1 mM IPTG at 28 °C for 6 h, then the fermentation lasted for 10 hours                                                                                                                                               | 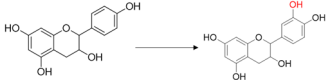<br>Afzelechin → Catechin                | 29.81 mg·L <sup>-1</sup> caffeic acid from 80 mg·L <sup>-1</sup> afzelechin, 35.2% conversion rate            | [32]      |
|              |                                                                                                                            |                                                                                                                                                                                                                                                                                         | <br>Naringenin → Eriodictyol             | 46.84 mg·L <sup>-1</sup> eriodictyol from 80 mg/L naringenin, 57.67 % conversion rate                         |           |
|              |                                                                                                                            |                                                                                                                                                                                                                                                                                         | <br>Kaempferol → Quercetin               | 20.14 mg·L <sup>-1</sup> quercetin from 80 mg·L <sup>-1</sup> kaempferol, 23.84 conversion rate               |           |
|              |                                                                                                                            |                                                                                                                                                                                                                                                                                         | <br>Dihydrokaempferol → Dihydroquercetin | 20.05 mg·L <sup>-1</sup> dihydroquercetin from 80 mg·L <sup>-1</sup> dihydrokaempferol, 23.7% conversion rate |           |
| Fermentation | <i>E. coli</i> overexpressing native HpaBC (BL21star <sup>TM</sup> (DE3)-pETM6/hpaBC)                                      | Andrew's Magic Media (AMM) with 20 g·L <sup>-1</sup> glycerol (For catechin, 20 g·L <sup>-1</sup> glucose), substrate added after induced with 0.1 mM IPTG at 37 °C for 1 h (For caffeic acid and catechin, substrate after induced for 2 h), then the fermentation lasted for 48 hours | <br>Naringenin → Eriodictyol            | 62.7 mg·L <sup>-1</sup> eriodictyol from 300 mg·L <sup>-1</sup> naringenin, 19.74 % conversion rate           | [66]      |
|              |                                                                                                                            |                                                                                                                                                                                                                                                                                         | <br>p-Coumaric acid → Caffeic acid     | 3.46 g·L <sup>-1</sup> caffeic acid from 4 g·L <sup>-1</sup> p-coumaric acid, 78.82% conversion rate          |           |
|              |                                                                                                                            |                                                                                                                                                                                                                                                                                         | <br>Afzelechin → Catechin              | 34.7 mg·L <sup>-1</sup> catechin from 300 mg·L <sup>-1</sup> afzelechin, 10.93% conversion rate               |           |

Table S2 (continued)

| Method                   | Catalysts                                                                                                                            | Production condition                                                                                                                                                                                       | Reaction                                                                                                                              | Results                                                                                                                                                                                                                                                                        | Reference |
|--------------------------|--------------------------------------------------------------------------------------------------------------------------------------|------------------------------------------------------------------------------------------------------------------------------------------------------------------------------------------------------------|---------------------------------------------------------------------------------------------------------------------------------------|--------------------------------------------------------------------------------------------------------------------------------------------------------------------------------------------------------------------------------------------------------------------------------|-----------|
| Resting cells conversion | <i>E. coli</i> overexpressing native HpaBC ( <i>E. coli</i> BW25113- pZE-HpaBC)                                                      | M9Y medium containing whole-cells (OD <sub>600</sub> =9.6) and 1.5 mM ascorbic acid, conversion in shake flasks for 18 h with substrate supplementation                                                    | 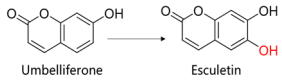<br>Umbelliferone → Esculetin                      | 2.7 g·L <sup>-1</sup> esculetin, close to 100% high yields.                                                                                                                                                                                                                    | [24]      |
|                          |                                                                                                                                      |                                                                                                                                                                                                            | <br>Resveratrol → Piceatannol                      | 1.2 g·L <sup>-1</sup> piceatannol, close to 100% high yields                                                                                                                                                                                                                   |           |
| Resting cells conversion | <i>E. coli</i> overexpressing native HpaBC (BL21 (DE3)-pETDuet/hpaBC)                                                                | 50 mM potassium phosphate buffer (pH 7.0) containing 10.4 g CDW/L whole cells and 4.8 mM substrate, conversion carried out in a 7.5-L stirred tank bioreactor at 30 °C for 3 h                             | <br>4-halophenol → 4-halocatechol (X=F, Cl, Br, I) | 0.54g·L <sup>-1</sup> (4.8 mM) 4-fluorophenol, with 100% conversion rate in 1.5 h. 0.62g·L <sup>-1</sup> (4.8 mM) 4-Chlorophenol, 0.83g·L <sup>-1</sup> (4.8 mM) 4-Bromophenol, 1.06g·L <sup>-1</sup> (4.8 mM) 4-Iodophenol with 40%, 32% and 5% conversion rate, respectively | [31]      |
| Resting cells conversion | <i>E. coli</i> overexpressing native HpaBC (BL21 (DE3)-pET28/hpaBC)                                                                  | 50 mM phosphate buffer (pH 7.0) with addition glucose and <i>p</i> -coumaric acid at a rate of 1.67 g·L <sup>-1</sup> ·h <sup>-1</sup> and 5.4 g/(L·h), respectively, in a 5 L bioreactor at 37 °C for 6 h | <br>p-Coumaric acid → Caffeic acid                | 18.74 g·L <sup>-1</sup> of caffeic acid, 78.81% conversion rate                                                                                                                                                                                                                | [28]      |
| Resting cells conversion | <i>E. coli</i> overexpressing HpaB (S210T, A211L, Q212E, Y282H) C ( <i>E. coli</i> MG1655-pEtac/HpaB (S210T, A211L, Q212E, Y282H) C) | M9Y medium with 50 mM tyrosol and incubated at 200 rpm and 30 °C                                                                                                                                           | <br>Tyrosol → Hydroxytyrosol                     | 7.43 g·L <sup>-1</sup> (48.2 mM) hydroxytyrosol converted from 6.91 g·L <sup>-1</sup> (50 mM) tyrosol, 96.3% conversion rate                                                                                                                                                   | [37]      |

Table S2 (continued)

| Method                   | Catalysts                                                                                    | Production condition                                                                                                                                                                                                                                                                                                                                                       | Reaction                                                                            | Results                                                                                                           | Reference |
|--------------------------|----------------------------------------------------------------------------------------------|----------------------------------------------------------------------------------------------------------------------------------------------------------------------------------------------------------------------------------------------------------------------------------------------------------------------------------------------------------------------------|-------------------------------------------------------------------------------------|-------------------------------------------------------------------------------------------------------------------|-----------|
| Resting cells conversion | <i>E. coli</i> overexpressing <i>Pseudomonas aeruginosa</i> HpaBC (BL21 (DE3)-pETDuet/hpaBC) | 200 mM potassium phosphate buffer (pH 7.5) containing 32 g CDW/L whole cells, glycerol (10% v/v) and Tween 80 (1% v/v), conversion carried out at 30 °C in shake flasks for 12 h                                                                                                                                                                                           | 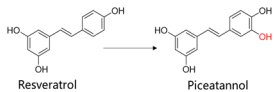 | 5.62 g·L <sup>-1</sup> (23 mM) piceatannol from 6.85 g·L <sup>-1</sup> (30 mM) resveratrol, 76.7% conversion rate | [67]      |
| Enzyme                   | <i>Acinetobacter baumannii</i> HpaB mutant Y398S                                             | The reaction carried out in a mixture of 1 mM glucose-6-phosphate, 100 nM HpaC from <i>Acinetobacter baumannii</i> , 10 μM NAD <sup>+</sup> , 1 μM FMN, 2 μM Y398S, 50 μM <i>p</i> -coumaric acid, 1.4 mM ascorbic acid, 0.5 unit·mL <sup>-1</sup> glucose-6-phosphate dehydrogenase ml in 50 mM NaH <sub>2</sub> PO <sub>4</sub> (pH 7.0) at room temperature for 180 min |  | 8.2 mg·L <sup>-1</sup> (50 μM) <i>p</i> -coumaric acid could completely convert to 3,4,5-THCA within 180 min      | [30]      |
